# Supplementary material for: Estimating real driving emissions from multi-axis differential optical absorption spectroscopy (MAX-DOAS) measurements at the A60 motorway near Mainz, Germany
Source: Copernicus journal article supplement (doi:10.5194/amt-14-769-2021), 2021-02-01
Supplement: Supplementary file 1 [file amt-14-769-2021-supplement.zip]

Archive with 4 entries (3 files):
- Supplement/
- Supplement/README.txt
- Supplement/data_20190510.nc
- amt-14-769-2021-supplement-title-page.pdf
