# Supplementary material for: Estimating real driving emissions from multi-axis differential optical absorption spectroscopy (MAX-DOAS) measurements at the A60 motorway near Mainz, Germany
Source: Copernicus journal article supplement (doi:10.5194/amt-14-769-2021), 2021-02-01
Supplement: Supplementary file 1 [file amt-14-769-2021-supplement.zip › amt-14-769-2021-supplement-title-page.pdf]

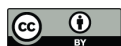

## *Supplement of*

# **Estimating real driving emissions from multi-axis differential optical absorption spectroscopy (MAX-DOAS) measurements at the A60 motorway near Mainz, Germany**

**Bianca Lauster et al.**

*Correspondence to:* Bianca Lauster (b.lauster@mpic.de)

- amt-14-769-2021-supplement-title-page.pdf
- Supplement
  - README.txt
  - data\_20190510.nc

The copyright of individual parts of the supplement might differ from the CC BY 4.0 License.
