# Supplementary material for: Estimating real driving emissions from multi-axis differential optical absorption spectroscopy (MAX-DOAS) measurements at the A60 motorway near Mainz, Germany
Source: Copernicus journal article supplement (doi:10.5194/amt-14-769-2021), 2021-02-01
Supplement: Supplementary file 1 [file amt-14-769-2021-supplement.zip › Supplement/README.txt]

# SUPPLEMENTARY MATERIAL

This zip file contains the supplementary material of the manuscript titled "Estimating real driving emissions from MAX-DOAS measurements at the A60 motorway near Mainz, Germany" by Bianca Lauster et al.

The file data_20190510.nc contains the data of the spectral analysis for both MAX-DOAS instruments as well as the weather station dataset.
It is organised in three groups (DOAS_west, DOAS_east and Weather_station) with all information given in the attributes and subgroups of the respective instrument.
